# Supplementary material for: “Because if we talk about health issues first, it is easier to talk about human trafficking”; findings from a mixed methods study on health needs and service provision among migrant and trafficked fishermen in the Mekong
Source: Springer Nature journal article supplement (doi:10.1186/s12992-018-0361-x), 2018-05-08
Supplement: MOESM1 [file 15751254]

## Conceptual Framework A. Factors influencing physical health of trafficked fishermen

| Pre-trafficking                                                                                                                                                                                                                                                                                                                                                                                                                                                                                                                                                                                                                                               | Trafficking stage                                                                                                                                                                                                                                                                                                                                                                                                                                                                                                                                                                                                                                                                                                                                                                                                                                                                                                                                                                                                                                                                                         | Exit from trafficking                                                                                                                                                                                                                                                                                                                                                                                       | Post-trafficking routes                                                                                                                                                                                                                                                                                                                                                                                                                                                                                                                                                                                                                                                                                                                                                                                                                                                                                                                                                                                                                                                                                                | Post-trafficking physical health                                                                                                                                                                                                                                                                                                                                                                                                                                                                                                                                                                                                                                                                                                                                                                                                                                                                                                                 |                                                                                                                                                                                                                                                                                                                                                                                                                                                                                                                                                                                                                                       |
|---------------------------------------------------------------------------------------------------------------------------------------------------------------------------------------------------------------------------------------------------------------------------------------------------------------------------------------------------------------------------------------------------------------------------------------------------------------------------------------------------------------------------------------------------------------------------------------------------------------------------------------------------------------|-----------------------------------------------------------------------------------------------------------------------------------------------------------------------------------------------------------------------------------------------------------------------------------------------------------------------------------------------------------------------------------------------------------------------------------------------------------------------------------------------------------------------------------------------------------------------------------------------------------------------------------------------------------------------------------------------------------------------------------------------------------------------------------------------------------------------------------------------------------------------------------------------------------------------------------------------------------------------------------------------------------------------------------------------------------------------------------------------------------|-------------------------------------------------------------------------------------------------------------------------------------------------------------------------------------------------------------------------------------------------------------------------------------------------------------------------------------------------------------------------------------------------------------|------------------------------------------------------------------------------------------------------------------------------------------------------------------------------------------------------------------------------------------------------------------------------------------------------------------------------------------------------------------------------------------------------------------------------------------------------------------------------------------------------------------------------------------------------------------------------------------------------------------------------------------------------------------------------------------------------------------------------------------------------------------------------------------------------------------------------------------------------------------------------------------------------------------------------------------------------------------------------------------------------------------------------------------------------------------------------------------------------------------------|--------------------------------------------------------------------------------------------------------------------------------------------------------------------------------------------------------------------------------------------------------------------------------------------------------------------------------------------------------------------------------------------------------------------------------------------------------------------------------------------------------------------------------------------------------------------------------------------------------------------------------------------------------------------------------------------------------------------------------------------------------------------------------------------------------------------------------------------------------------------------------------------------------------------------------------------------|---------------------------------------------------------------------------------------------------------------------------------------------------------------------------------------------------------------------------------------------------------------------------------------------------------------------------------------------------------------------------------------------------------------------------------------------------------------------------------------------------------------------------------------------------------------------------------------------------------------------------------------|
|                                                                                                                                                                                                                                                                                                                                                                                                                                                                                                                                                                                                                                                               |                                                                                                                                                                                                                                                                                                                                                                                                                                                                                                                                                                                                                                                                                                                                                                                                                                                                                                                                                                                                                                                                                                           |                                                                                                                                                                                                                                                                                                                                                                                                             | RISK OF RETRAFFICKING                                                                                                                                                                                                                                                                                                                                                                                                                                                                                                                                                                                                                                                                                                                                                                                                                                                                                                                                                                                                                                                                                                  | 1 month                                                                                                                                                                                                                                                                                                                                                                                                                                                                                                                                                                                                                                                                                                                                                                                                                                                                                                                                          | 3-12 months                                                                                                                                                                                                                                                                                                                                                                                                                                                                                                                                                                                                                           |
| <p>*Socioeconomic characteristics</p> <ul style="list-style-type: none"> <li>- age</li> <li>- education</li> <li>- income</li> </ul> <p>*Past physical or mental abuse exposures</p> <p>*Health knowledge/practices</p> <p>*Masculinity and health seeking behavior</p> <p>*Perceived health needs</p> <p>*Location of home/worksites, relative to HSPs &amp; transport access</p> <ul style="list-style-type: none"> <li>- opportunity cost of accessing services</li> </ul> <p>*Ability to access healthcare (financial, logistical)</p> <p>*Self-treatment</p> <p>*Rights to care in home country</p> <p>*Social and cultural barriers or facilitators</p> | <p>*Occupational harm/exposures</p> <ul style="list-style-type: none"> <li>- overexposure to elements</li> <li>- badly maintained or no equipment</li> <li>- long working hours</li> <li>- few or no rest breaks</li> <li>- fatigue/sleep deprivation</li> <li>- repeated bending/lifting heavy objects</li> <li>- unstable platforms</li> <li>- exposure to chemicals</li> <li>- serious injuries</li> </ul> <p>*Poor living conditions</p> <ul style="list-style-type: none"> <li>- food/water deprivation</li> <li>- restricted space</li> <li>- poor hygiene</li> <li>- isolation at sea, inability to access care</li> </ul> <p>*Violence exposures</p> <ul style="list-style-type: none"> <li>- severity and frequency of physical and psychological abuse by superiors</li> <li>- witness of murder</li> <li>- forced drug taking</li> </ul> <p>*Duration of trafficking situation</p> <p>*Risky behaviours <input checked="" type="checkbox"/></p> <ul style="list-style-type: none"> <li>- condom use</li> <li>- alcohol/substance abuse</li> </ul> <p>*Cash payments (frequency and amount)</p> | <p>*Escape</p> <ul style="list-style-type: none"> <li>- high risk (jump ship/escape at port whilst docked)</li> </ul> <p>*Outside intervention</p> <ul style="list-style-type: none"> <li>- police / immigration raid (with/without NGO)</li> <li>- NGO alone</li> </ul> <p>*Other</p> <ul style="list-style-type: none"> <li>- paid off debt and allowed to leave</li> <li>- injured and let go</li> </ul> | <p>*Find alternative work</p> <ul style="list-style-type: none"> <li>- e.g. plantations/agriculture</li> </ul> <p>*Detention</p> <ul style="list-style-type: none"> <li>- risk of return to boat owner by police</li> <li>- poor healthcare access</li> <li>- unsanitary conditions</li> <li>- duration of detention</li> </ul> <p>*NGO/shelter</p> <ul style="list-style-type: none"> <li>- physical health support</li> <li>- mental health support</li> <li>- culturally appropriate services for men</li> <li>- types of assistance offered (e.g. training, business grant)</li> <li>- duration of shelter stay</li> <li>- ability to work whilst in shelter (restricted mobility / inability to work &gt; risk of re-trafficking)</li> <li>- follow-up assistance after leaving shelter (physical health, counseling, grants)</li> </ul> <p>*No assistance <input checked="" type="checkbox"/></p> <ul style="list-style-type: none"> <li>- identified +unassisted (no assistance offered/available, identified but did not need assistance/declined assistance</li> <li>- unidentified and unassisted</li> </ul> | <p>*Perceived health needs</p> <p>*Masculinity and health seeking behaviour</p> <p>*Ability to access healthcare (financial, logistical)</p> <p>*Social support (family, shelter)</p> <p>*Anticipated stressors</p> <ul style="list-style-type: none"> <li>- financial (ability to work + earn, work opportunities, family needs, debt)</li> <li>- social (isolation, experience of shame, fear and stigma)</li> <li>- own physical or mental health</li> <li>- exposure to violence on return</li> <li>- unmet needs (above)</li> </ul> <p>*Future hopes</p> <ul style="list-style-type: none"> <li>- social (marriage, kids)</li> <li>- financial (job, income)</li> <li>- cultural (ability to fulfill family and social obligations)</li> </ul> <p>*Feelings of empowerment</p> <p style="text-align: center;">↕</p> <p>*Mental health</p> <ul style="list-style-type: none"> <li>- depression</li> <li>- anxiety</li> <li>- PTSD</li> </ul> | <p>*Coping responses <input checked="" type="checkbox"/></p> <ul style="list-style-type: none"> <li>- Positive and negative (e.g. substance abuse)</li> </ul> <p>*Recovery environment characteristics</p> <ul style="list-style-type: none"> <li>- access to health services/mental health support</li> <li>- work opportunities</li> <li>- social support</li> </ul> <p>*Anticipated stressors</p> <p>*Current perceived needs/future hopes/feelings of empowerment</p> <p>*Mental health <input checked="" type="checkbox"/></p> <ul style="list-style-type: none"> <li>- depression</li> <li>- anxiety</li> <li>- PTSD</li> </ul> |
| <b>HEALTHCARE ACCESS AS CITIZEN</b>                                                                                                                                                                                                                                                                                                                                                                                                                                                                                                                                                                                                                           | <b>POLICY AND POLITICAL INFLUENCES OVER HEALTHCARE ACCESS FOR MIGRANTS</b>                                                                                                                                                                                                                                                                                                                                                                                                                                                                                                                                                                                                                                                                                                                                                                                                                                                                                                                                                                                                                                |                                                                                                                                                                                                                                                                                                                                                                                                             |                                                                                                                                                                                                                                                                                                                                                                                                                                                                                                                                                                                                                                                                                                                                                                                                                                                                                                                                                                                                                                                                                                                        | <b>HEALTHCARE ACCESS (CITIZEN OR MIGRANT)</b>                                                                                                                                                                                                                                                                                                                                                                                                                                                                                                                                                                                                                                                                                                                                                                                                                                                                                                    |                                                                                                                                                                                                                                                                                                                                                                                                                                                                                                                                                                                                                                       |
|                                                                                                                                                                                                                                                                                                                                                                                                                                                                                                                                                                                                                                                               | - migrant healthcare access policies/legislation – illegality&health-related "deservingness" - perceptions of public health/security risk                                                                                                                                                                                                                                                                                                                                                                                                                                                                                                                                                                                                                                                                                                                                                                                                                                                                                                                                                                 |                                                                                                                                                                                                                                                                                                                                                                                                             |                                                                                                                                                                                                                                                                                                                                                                                                                                                                                                                                                                                                                                                                                                                                                                                                                                                                                                                                                                                                                                                                                                                        |                                                                                                                                                                                                                                                                                                                                                                                                                                                                                                                                                                                                                                                                                                                                                                                                                                                                                                                                                  |                                                                                                                                                                                                                                                                                                                                                                                                                                                                                                                                                                                                                                       |

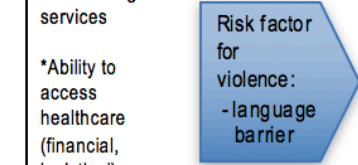

- Relevant to overall conceptual model but will not be included in analyses (due to nature of STEAM data or not feasible)
- Anticipated stressors mediate relationship between trafficking exposures and mental health (examined at one time only)
- Relevant to overall conceptual model but will not be included in analyses (due to nature of STEAM data or not feasible)

Source: Pocock NS. Occupational risks, health needs and victim identification of trafficked fishermen in the Greater Mekong Subregion (GMS). PhD thesis [London]: London School of Hygiene and Tropical Medicine; 2017.

## Conceptual Framework B. Factors influencing healthcare responses for migrant or trafficked fishermen in Thailand

| Healthcare responses as citizen                                                                                                                                                                                                                                                                                                                                                                                                  | HEALTHCARE RESPONSES AS MIGRANT                                                                                                                                                                                                                                                                                                                                                                                                                                                                                                                                                                                                                                                                                                                                                                                                                                                        |                                                                                                                                                                                                                                                                                                                                                                  |                                                                                                                                                                                                                                                                                                                                                                                                                                                                                                                                                                                                                                                                                                       |                                                                                                                                                                                                                                                                                                                 | Healthcare responses as citizen or migrant                                                                                                                                                                                                                                                                                                                                                                 |                                        |
|----------------------------------------------------------------------------------------------------------------------------------------------------------------------------------------------------------------------------------------------------------------------------------------------------------------------------------------------------------------------------------------------------------------------------------|----------------------------------------------------------------------------------------------------------------------------------------------------------------------------------------------------------------------------------------------------------------------------------------------------------------------------------------------------------------------------------------------------------------------------------------------------------------------------------------------------------------------------------------------------------------------------------------------------------------------------------------------------------------------------------------------------------------------------------------------------------------------------------------------------------------------------------------------------------------------------------------|------------------------------------------------------------------------------------------------------------------------------------------------------------------------------------------------------------------------------------------------------------------------------------------------------------------------------------------------------------------|-------------------------------------------------------------------------------------------------------------------------------------------------------------------------------------------------------------------------------------------------------------------------------------------------------------------------------------------------------------------------------------------------------------------------------------------------------------------------------------------------------------------------------------------------------------------------------------------------------------------------------------------------------------------------------------------------------|-----------------------------------------------------------------------------------------------------------------------------------------------------------------------------------------------------------------------------------------------------------------------------------------------------------------|------------------------------------------------------------------------------------------------------------------------------------------------------------------------------------------------------------------------------------------------------------------------------------------------------------------------------------------------------------------------------------------------------------|----------------------------------------|
|                                                                                                                                                                                                                                                                                                                                                                                                                                  | Pre-trafficking                                                                                                                                                                                                                                                                                                                                                                                                                                                                                                                                                                                                                                                                                                                                                                                                                                                                        | Trafficking stage                                                                                                                                                                                                                                                                                                                                                | Exit from trafficking                                                                                                                                                                                                                                                                                                                                                                                                                                                                                                                                                                                                                                                                                 | Post-trafficking routes                                                                                                                                                                                                                                                                                         |                                                                                                                                                                                                                                                                                                                                                                                                            | Post-trafficking health service access |
|                                                                                                                                                                                                                                                                                                                                                                                                                                  |                                                                                                                                                                                                                                                                                                                                                                                                                                                                                                                                                                                                                                                                                                                                                                                                                                                                                        |                                                                                                                                                                                                                                                                                                                                                                  |                                                                                                                                                                                                                                                                                                                                                                                                                                                                                                                                                                                                                                                                                                       | RISK OF RETRAFFICKING                                                                                                                                                                                                                                                                                           |                                                                                                                                                                                                                                                                                                                                                                                                            | 1 month                                |
| *Perceived healthcare needs<br><br>*Rights to care in home country<br><br>*Education, gender, culture, age, income<br>- health knowledge/practices<br>- health seeking behaviour<br><br>*Social and cultural barriers or facilitators<br><br>*Location of home/worksite, relative to HSPs & transport access<br>- opportunity cost of accessing services<br><br>*Ability to pay for healthcare<br><br>*Self-treatment            | *Freedom of movement<br><br>*Fear of arrest/deportation<br><br>*Location of worksite, i.e. physical isolation at sea<br><br>*Physical proximity of public/private HSPs & access to transport<br><br>*Ability to pay for care/transport to HSP<br><br>*Working hours, time off for sickness/HSP visits<br><br>*Legal status & possession of documents (e.g. work permits, MHI card, passport) that enable access to care<br><br>*Language skills/translator availability at HSP<br><br>*Perceived healthcare needs<br><br>*Masculinity & health seeking behaviour<br><br>*Knowledge/information on how to access care<br><br>*Healthcare knowledge of co-workers/ boss/ trafficker (when care received is not from health worker), re. type of care/remedy received<br><br>*Irregular migrant worker health insurance entitlements – knowledge of worker and HSP<br><br>*Self-treatment | Escape, outside intervention (NGO, police) or other:<br><br>*Perceived healthcare needs<br><br>*Masculinity & health seeking behaviour<br><br>*Injuries/illness requiring immediate attention<br><br>*Ability to travel to/knowledge of HSP location<br><br>*Ability to pay for healthcare<br><br>*Legal status & possession of documents<br><br>*Self-treatment | *Perceived healthcare needs<br><br>*Language skills/translator availability at HSP<br><br>*Masculinity & health seeking behaviour<br><br>*Alternative work<br>- location of worksite relative to HSPs & transport access<br>- ability to pay for care/transport<br>- legal status & possession of documents<br><br>*Detention<br>- restricted movement<br>- referral mechanisms for health services<br>- perceived deservingness for care & referrals by detention staff<br><br>*Post-trafficking network healthcare<br>- health worker expertise/capacity<br>- mental health support available<br>- services for men<br>- referral mechanisms for specialized health services<br><br>*Self-treatment | *Perceived healthcare needs<br><br>*Masculinity & health seeking behaviour<br><br>*Social and cultural barriers or facilitators<br><br>*Ability to pay for care/transport to HSP<br><br>*Ability to pay for care/transport to HSP<br><br>*Language skills/translator availability at HSP<br><br>*Self-treatment | *Perceived healthcare needs<br><br>*Masculinity & health seeking behaviour<br><br>*Social and cultural barriers or facilitators<br><br>*Ability to pay for care/transport to HSP<br><br>*Recovery environment characteristics<br>- location of home/worksite, relative to HSPs & transport access<br>- mental health support<br><br>*Language skills/translator availability at HSP<br><br>*Self-treatment |                                        |
| <b>POLICY AND POLITICAL INFLUENCES OVER HEALTHCARE REPONSES TOWARDS MIGRANTS</b><br>- migrant healthcare access rights/ policies / legislation - illegality and health-related “deservingness” - perceptions of public health /security risk<br><b>POLICY AND POLITICAL INFLUENCES OVER OHS/LABOUR PROTECTION</b><br>- fishing sector regulation - moral worthiness of male migrant’s bodies - neoliberal organization of labour |                                                                                                                                                                                                                                                                                                                                                                                                                                                                                                                                                                                                                                                                                                                                                                                                                                                                                        |                                                                                                                                                                                                                                                                                                                                                                  |                                                                                                                                                                                                                                                                                                                                                                                                                                                                                                                                                                                                                                                                                                       |                                                                                                                                                                                                                                                                                                                 |                                                                                                                                                                                                                                                                                                                                                                                                            |                                        |

Source: Pocock NS. Occupational risks, health needs and victim identification of trafficked fishermen in the Greater Mekong Subregion (GMS). PhD thesis [London]: London School of Hygiene and Tropical Medicine; 2017.
